# Supplementary material for: Genomics-guided discovery of a new and significantly better source of anticancer natural drug FK228
Source: PubMed Central journal article supplement — Synth Syst Biotechnol. 2018 Nov 5;3(4):268–74. doi: 10.1016/j.synbio.2018.10.011 (PMC6222137; doi:10.1016/j.synbio.2018.10.011), 2018-11-05
Supplement: mmc1.pdf [file mmc1.pdf]

## Supplemental Data

# Genomics-Guided Discovery of a New and Significantly Better Source of Anticancer Natural Drug FK228

Xiangyang Liu<sup>a,b\*</sup>, Feng Xie<sup>c\*</sup>, Leah B. Doughty<sup>d</sup>, Qi Wang<sup>c</sup>, Lixin Zhang<sup>a,c</sup>, Xueting Liu<sup>a\*\*</sup> and Yi-Qiang Cheng<sup>b,d\*\*</sup>

<sup>a</sup> State Key Laboratory of Bioreactor Engineering, East China University of Science and Technology, Shanghai 200237, P.R. China.

<sup>b</sup> UNT System College of Pharmacy, University of North Texas Health Science Center, Fort Worth, TX 76107, USA.

<sup>c</sup> CAS Key Laboratory of Pathogenic Microbiology and Immunology, Institute of Microbiology, Chinese Academy of Sciences, Beijing 100101, P.R. China.

<sup>d</sup> Department of Biological Sciences, University of Wisconsin–Milwaukee, Milwaukee, WI 53201, USA

\* These two authors made equal contribution to the work.

\*\*Co-corresponding authors. Mailing addresses: UNT System College of Pharmacy, University of North Texas Health Science Center, Fort Worth, TX 76107, USA. Phone: +001-817-7350165; Fax: +001-817-7352603; E-mail: [YiQiang.Cheng@unthsc.edu](mailto:YiQiang.Cheng@unthsc.edu).

State Key Laboratory of Bioreactor Engineering, East China University of Science and Technology, Shanghai 200237, China. Liuxt2010@126.com

Running title: A new and better source of FK228

Table S1. Bacterial strains and plasmids used in this study

| Strains or plasmids               | Description <sup>a</sup>                                                                                     | Source or reference |
|-----------------------------------|--------------------------------------------------------------------------------------------------------------|---------------------|
| <i>Burkholderia thailandensis</i> |                                                                                                              |                     |
| MSMB43                            | Wild type strain, FK228-producing, Am <sup>r</sup>                                                           | (1)                 |
| MSMB43/pBMTL3- <i>depR</i>        | MSMB43 harboring pBMTL3- <i>depR</i> , FK228 production unchanged, Am <sup>r</sup> Cm <sup>r</sup>           | This work           |
| MSMB43/pBMTL3- <i>spiR</i>        | MSMB43 harboring pBMTL3- <i>spiR</i> , FK228 production decreased, Am <sup>r</sup> Cm <sup>r</sup>           | This work           |
| MSMB43/pBMTL3- <i>tdpR</i>        | MSMB43 harboring pBMTL3- <i>tdpR</i> , increased FK228 production, Am <sup>r</sup> Cm <sup>r</sup>           | This work           |
| MSMB43/pBMTL-3                    | Control strain, MSMB43 harboring vector pBMTL-3, FK228 production unchanged, Am <sup>r</sup> Cm <sup>r</sup> | This work           |
| <i>Chromobacterium violaceum</i>  |                                                                                                              |                     |
| no. 968 (=FERM BP-1968)           | Wild type strain, FK228-producing, Ap <sup>r</sup> Thio <sup>r</sup>                                         | IPOD <sup>b</sup>   |
| <i>Escherichia coli</i>           |                                                                                                              |                     |
| DH5α                              | General cloning host                                                                                         | Lab stock           |
| S17-1                             | Host strain for interspecies conjugation                                                                     | Lab stock           |
| S17-1/pBMTL3- <i>depR</i>         | Donor strain of pBMTL3- <i>depR</i> for conjugation                                                          | (2)                 |
| S17-1/pBMTL3- <i>spiR</i>         | Donor strain of pBMTL3- <i>spiR</i> for conjugation                                                          | (3)                 |
| S17-1/pBMTL3- <i>tdpR</i>         | Donor strain of pBMTL3- <i>tdpR</i> for conjugation                                                          | (4)                 |
| S17-1/pBMTL3                      | Donor strain of pBMTL-3 for conjugation                                                                      | (2)                 |
| Plasmids                          |                                                                                                              |                     |
| pET29a                            | <i>E. coli</i> -based gene expression vector                                                                 | Novagen             |
| pBMTL-3                           | Cm <sup>r</sup> , pBBR1 <i>ori</i> , broad host-range vector                                                 | (5)                 |
| pBMTL3- <i>depR</i>               | Cm <sup>r</sup> , <i>Cv_depR</i> (with RBS from pET29a) cloned into pBMTL-3                                  | (2)                 |
| pBMTL3- <i>spiR</i>               | Cm <sup>r</sup> , <i>spiR</i> (with RBS from pET29a) cloned into pBMTL-3                                     | (3)                 |
| pBMTL3- <i>tdpR</i>               | Cm <sup>r</sup> , <i>tdpR</i> (with RBS from pET29a) cloned into pBMTL-3                                     | (4)                 |

<sup>a</sup> Am<sup>r</sup>, apramycin resistance; Ap<sup>r</sup>, ampicillin resistance; Cm<sup>r</sup>, chloramphenicol resistance; Thio<sup>r</sup>, thioestrepton resistance.

<sup>b</sup> IPOD, International Patent Organism Depository, Tsukuba, Japan.

Table S2. List of primers used for quantitative real-time PCR in this study.

| Gene        | Primer name <sup>a</sup> | Sequence (5'→3')       | Amplicon size |
|-------------|--------------------------|------------------------|---------------|
| <i>DepA</i> | Cv_depA-RT-F             | CACCTCGGGGTCCACGCG     | 186 bp        |
|             | Cv_depA-RT-R             | GGGAAAACCGCATTGCAAGGG  |               |
|             | Bth_depA-RT-F            | CGGCGACTACACCAGCAATAC  | 196 bp        |
|             | Bth_depA-RT-R            | CAGCAGGCTCGTCAGGACTA   |               |
| <i>DepJ</i> | Cv_depJ-RT-F             | CCTTGTTTCGGGCACAGCAT   | 183 bp        |
|             | Cv_depJ-RT-R             | TCCTCATCACCTCGTCCAGAA  |               |
|             | Bth_depJ-RT-F            | TGACGGAAGCCATCACGCCG   | 283 bp        |
|             | Bth_tdpJ-RT-R            | GATCGGCAGGATCATCTTGACG |               |
| <i>DepR</i> | Cv_depR-RT-F             | TGATCCTGGAGGAGAACTACAC | 194 bp        |
|             | Cv_depR-RT-R             | CAGTTGATTGGCGGCGATG    |               |
|             | Bth_depR-RT-F            | AAGCGAACGCCGACAAGCT    | 197 bp        |
|             | Bth_depR-RT-R            | CGCAACGAGGTAGTACGCATAC |               |
| 16S rDNA    | 16S-RT-F                 | GACTCCTACGGGAGGCAGC    | 199 bp        |
|             | 16S-RT-R                 | GTATTACCGCGGCTGCTGGC   |               |

<sup>a</sup> Cv, *C. violaceum* No. 968; Bth, *B. thailandensis* MSMB43.

Table S3. Comparison of  $^1\text{H}$ - and  $^{13}\text{C}$ -NMR data of the newly purified FK228 from *B. thailandensis* MSMB43 with the historical data of FK228 from *C. violaceum* No. 968 (6)

| Position | $^1\text{H}$ NMR <sup>a</sup> |                   | $^{13}\text{C}$ NMR <sup>b</sup> |                   |
|----------|-------------------------------|-------------------|----------------------------------|-------------------|
|          | Sample Source                 |                   |                                  |                   |
|          | <i>Cv</i> No. 968             | <i>Bth</i> MSMB43 | <i>Cv</i> No. 968                | <i>Bth</i> MSMB43 |
| 1        | C=O                           | C=O               | 172.5                            | 172.1             |
| 2        | C=O                           | C=O               | 172.1                            | 171.5             |
| 3        | C=O                           | C=O               | 169.9                            | 169.5             |
| 4        | C=O                           | C=O               | 168.8                            | 168.3             |
| 5        | C=O                           | C=O               | 165.6                            | 165.4             |
| 6        | quaternary C                  | quaternary C      | 131.6                            | 130.8             |
| 7        | 5.80                          | 5.64              | 131.5                            | 130.6             |
| 8        | 5.95                          | 5.81              | 130.4                            | 129.9             |
| 9        | 6.21                          | 6.10              | 127.8                            | 127.6             |
| 10       | 5.70                          | 5.58              | 71.5                             | 71.2              |
| 11       | 3.96                          | 3.85              | 63.0                             | 62.2              |
| 12       | 4.40                          | 4.24              | 59.1                             | 58.8              |
| 13       | 4.68                          | 4.52              | 57.7                             | 57.1              |
| 14       | 3.00, 3.14                    | 2.96, 3.08        | 38.8                             | 38.3              |
| 15       | 2.67, 3.14                    | 2.50, 2.99        | 38.4                             | 38.1              |
| 16       | 3.21, 3.25                    | 3.04, 3.17        | 36.1                             | 35.7              |
| 17       | 2.33                          | 2.23              | 32.0                             | 31.1              |
| 18       | 2.70~2.59                     | 2.55              | 31.0                             | 30.5              |
| 19       | 2.27                          | 2.16              | 29.6                             | 28.9              |
| 20       | 1.10                          | 1.03              | 19.5                             | 19.5              |
| 21       | 1.07                          | 1.00              | 19.4                             | 19.4              |
| 22       | 1.02                          | 0.94              | 18.9                             | 19.0              |
| 23       | 0.98                          | 0.90              | 18.8                             | 19.0              |
| 24       | 1.66                          | 1.59              | 13.4                             | 13.8              |
| NH-1     | 8.98                          | 8.85              |                                  |                   |
| NH-2     | 8.46                          | 8.34              |                                  |                   |
| NH-3     | 7.81                          | 7.77              |                                  |                   |
| NH-4     | 7.73                          | 7.56              |                                  |                   |

<sup>a</sup> $^1\text{H}$  NMR data of our work were obtained at 500 MHz in DMSO-*d*6. The historical  $^1\text{H}$  NMR data were obtained at 400 MHz in DMF-*d*7; <sup>b</sup> $^{13}\text{C}$  NMR data of our work were obtained at 125 MHz in DMSO-*d*6. The historical NMR data were obtained at 100 MHz in DMF-*d*7. The minor value differences are likely due to the use of difference instruments and solvents.

Method: The newly purified FK228 was dissolved in DMSO-*d*6 and transferred into Shigemi NMR tube.  $^1\text{H}$  and  $^{13}\text{C}$  NMR spectra were obtained on a Bruker DRX-500 NMR spectrometer at 25°C. All 2D NMR experiments were performed employing the standard Bruker Topspin 3.1.b.11 Software package.

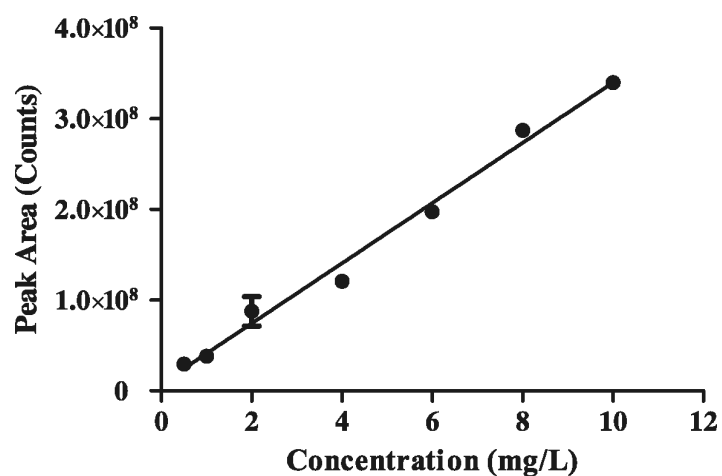

Fig. S1. Standard curve of FK228 concentrations vs. ion signal peak areas:

$$Y = 3E+07X + 8E+06 \quad (R^2 = 0.99)$$

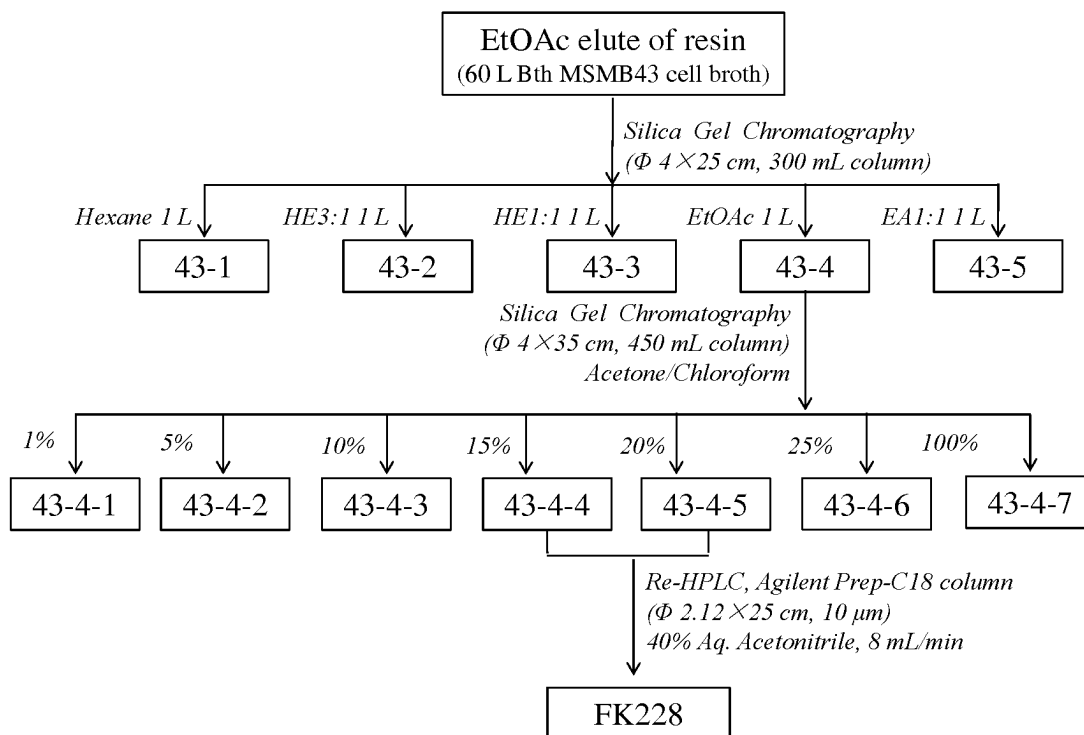

Fig. S2. Flow chart of larger scale purification of FK228 from the fermentation broth of *B. thailandensis* MSMB43.

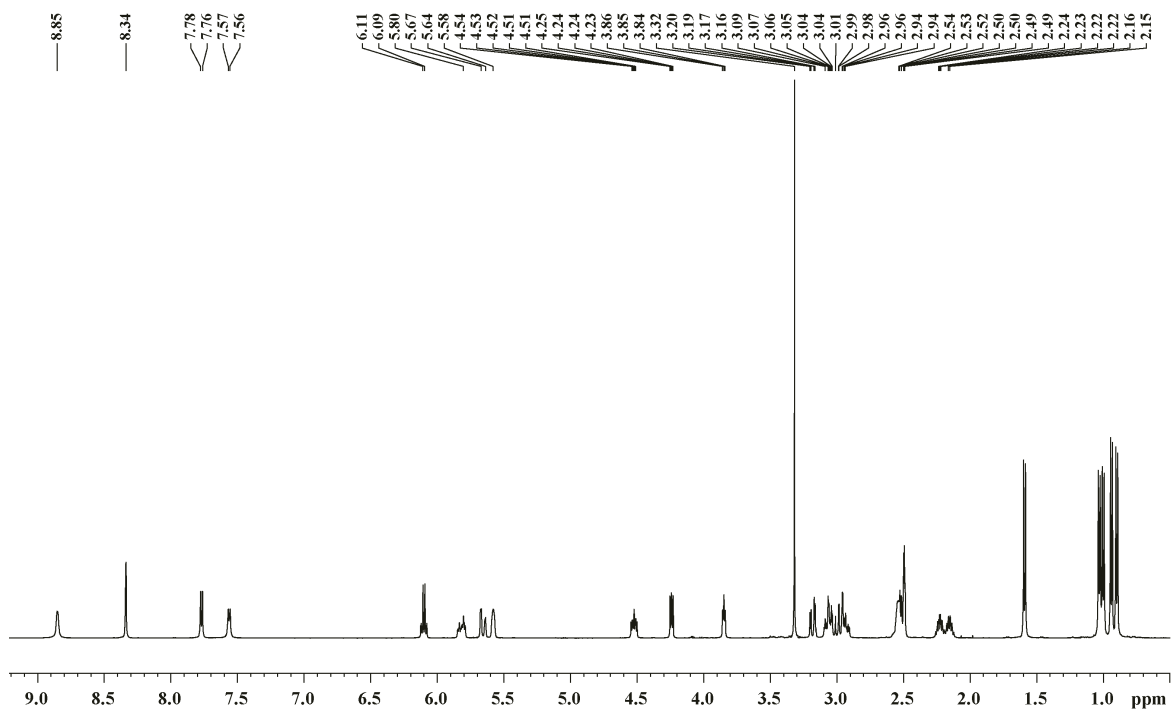

Fig. S3. Proton ( $^1\text{H}$ ) NMR spectrum of FK228 produced by *B. thailandensis* MSMB43.

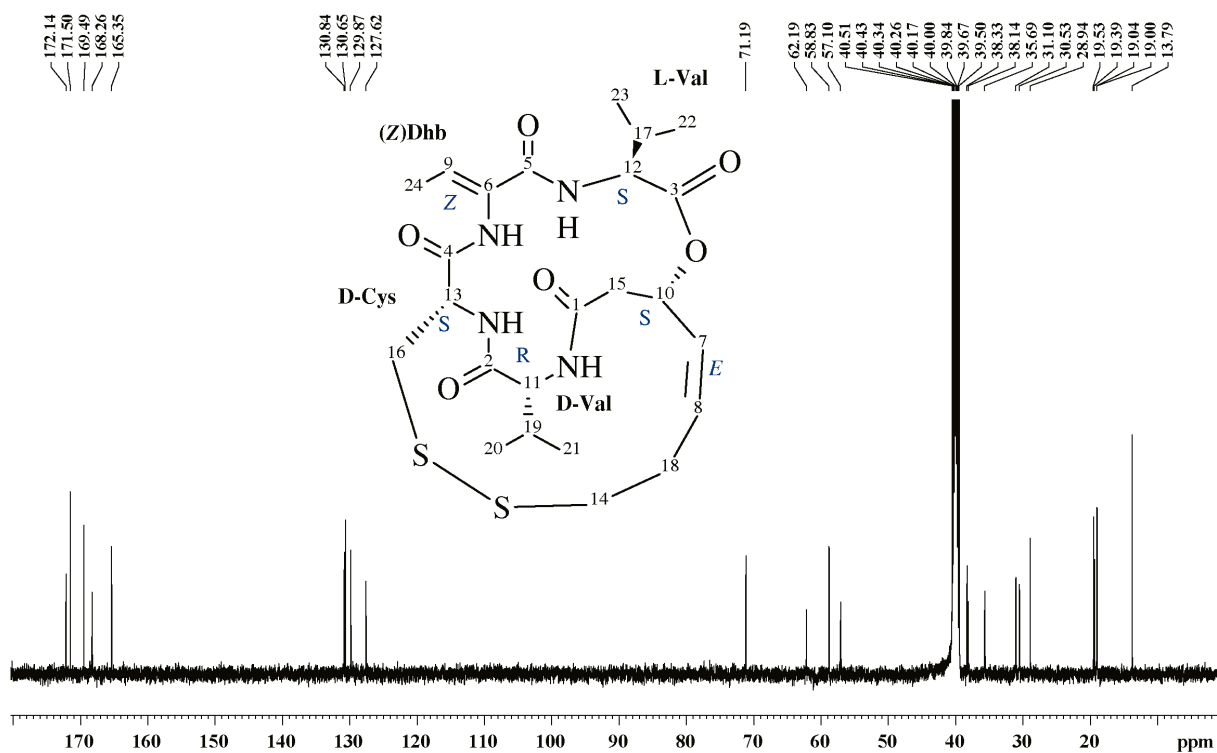

Fig. S4. Carbon ( $^{13}\text{C}$ ) spectrum of FK228 produced by *B. thailandensis* MSMB43.

## References

1. Gee JE, Glass MB, Novak RT, Gal D, Mayo MJ, Steigerwalt AG, Wilkins PP, Currie BJ. Recovery of a *Burkholderia thailandensis*-like isolate from an Australian water source. *BMC Microbiol* 2008;8:54. doi:10.1186/1471-2180-8-54.
2. Potharla VY, Wesener SR, Cheng Y-Q. New insights into the genetic organization of the FK228 biosynthetic gene cluster in *Chromobacterium violaceum* no. 968. *Appl Env Microbiol* 2011;77(4):1508-11. doi: 10.1128/AEM.01512-10.
3. Potharla VY, Wang C, Cheng Y-Q. Identification and characterization of the spiruchostatin biosynthetic gene cluster enable yield improvement by overexpressing a transcriptional activator. *J Ind Microbiol Biotech* 2014;41(9):1457-65. doi: 10.1007/s10295-014-1474-8.
4. Wang C, Henkes LM, Doughty LB, He M, Wang D, Meyer-Almes FJ, Cheng Y-Q. Thailandepsins: bacterial products with potent histone deacetylase inhibitory activities and broad-spectrum antiproliferative activities. *J Nat Prod* 2011;74(10):2031-8. doi: 10.1021/np200324x.
5. Lynch MD, Gill RT. Broad host range vectors for stable genomic library construction. *Biotech Bioeng* 2006;94(1):151-8.
6. Shigematsu N, Ueda H, Takase S, Tanaka H, Yamamoto K, Tada T. FR901228, a novel antitumor bicyclic depsipeptide produced by *Chromobacterium violaceum* No. 968. II. Structure determination. *J Antibiot (Tokyo)*. 1994;47(3):311-4.
